# Supplementary material for: The effect of bisphenol A on testicular steroidogenesis and its amelioration by quercetin: anin vivoandin silicoapproach
Source: Royal Society of Chemistry journal article supplement (doi:10.1039/c7tx00161d), 2017-09-14
Supplement: c7tx00161d1.pdf [file c7tx00161d1.pdf]

Table- S1 Effect of bisphenol A treatment on biochemical changes in testis of mice

| Sr. No.                                                         | Experimental group                                       | Total protein <sup>1</sup>                   | Total lipid <sup>1</sup>                     | Total cholesterol <sup>1</sup>               | 3β HSD <sup>2</sup>                             | 17β HSD <sup>2</sup>                         | Testosterone <sup>3</sup>                       |
|-----------------------------------------------------------------|----------------------------------------------------------|----------------------------------------------|----------------------------------------------|----------------------------------------------|-------------------------------------------------|----------------------------------------------|-------------------------------------------------|
| <b>Control groups</b>                                           |                                                          |                                              |                                              |                                              |                                                 |                                              |                                                 |
| I                                                               | <b>Untreated control</b>                                 | 13.257 ± 0.226                               | 6.162 ± 0.128                                | 1.250 ± 0.025                                | 0.680±0.018                                     | 0.542±0.018                                  | 2.724±0.041                                     |
| II                                                              | <b>Vehicle control</b><br>(0.2 ml olive oil /animal/day) | 13.115 ± 0.317                               | 6.190 ± 0.100                                | 1.252 ± 0.026                                | 0.666±0.021                                     | 0.543±0.017                                  | 2.738±0.046                                     |
| III                                                             | <b>Antidote control</b><br>(0.2 ml quercetin/animal/day) | 13.188 ± 0.159                               | 6.066 ±0.082                                 | 1.241±0.036                                  | 0.650 ± 0.018                                   | 0.541 ± 0.013                                | 2.659 ± 0.050                                   |
| <b>BPA-treated groups</b>                                       |                                                          |                                              |                                              |                                              |                                                 |                                              |                                                 |
| IV                                                              | <b>BPA-Low dose</b><br>(80mg/kg bodyweight/day)          | 10.024 ±<br>0.152 <sup>a</sup><br>(23.57)    | 4.718 ± 0.163 <sup>a</sup><br>(23.78)        | 0.978 ± 0.032 <sup>a</sup><br>(21.86)        | 0.487±0.021 <sup>a</sup><br>(27.04)             | 0.447±0.010 <sup>a</sup><br>(17.66)          | 2.274±0.051 <sup>a</sup><br>(16.95)             |
| V                                                               | <b>BPA-Medium dose</b><br>(120 mg/kg bodyweight/day)     | 8.537 ± 0.244 <sup>a</sup><br>(34.90)        | 3.258 ± 0.169 <sup>a</sup><br>(47.36)        | 0.641±0.020 <sup>a</sup><br>(48.78)          | 0.325±0.024 <sup>a</sup><br>(45.15)             | 0.329±0.014 <sup>a</sup><br>(39.47)          | 1.332±0.021 <sup>a</sup><br>(51.35)             |
| VI                                                              | <b>BPA-High dose</b><br>(240 mg/kg bodyweight/day)       | 6.805 ± 0.142 <sup>a</sup><br>(50.44)        | 2.171 ± 0.109 <sup>a</sup><br>(64.93)        | 0.376±0.015 <sup>a</sup><br>(69.97)          | 0.228±0.020 <sup>a</sup><br>(62.526)            | 0.221±0.010 <sup>a</sup><br>(59.37)          | 0.770±0.075 <sup>a</sup><br>(71.88)             |
| <b>HD BPA(240 mg/kg body weight) + Quercetin Treated groups</b> |                                                          |                                              |                                              |                                              |                                                 |                                              |                                                 |
| VII                                                             | <b>BPA-HD + quercetin</b><br>(30 mg/kg body weight/day)  | 9.609 ±0.339 <sup>b</sup><br><b>(47.00)</b>  | 4.034 ± 0.131 <sup>b</sup><br><b>(46.37)</b> | 0.886±0.023 <sup>b</sup><br><b>(58.25)</b>   | 0.400 ±<br>0.020 <sup>b</sup><br><b>(36.80)</b> | 0.348 ± 0.012 <sup>b</sup><br><b>(40.06)</b> | 1.482 ±<br>0.032 <sup>b</sup><br><b>(36.18)</b> |
| VIII                                                            | <b>BPA-HD + quercetin</b><br>(60 mg/kg body weight/day)  | 11.404 ±0.336 <sup>b</sup><br><b>(74.14)</b> | 4.790 ± 0.132 <sup>b</sup><br><b>(65.17)</b> | 1.021 ± 0.042 <sup>b</sup><br><b>(73.63)</b> | 0.528 ±<br>0.026 <sup>b</sup><br><b>(67.68)</b> | 0.420 ± 0.010 <sup>b</sup><br><b>(62.29)</b> | 2.134 ±<br>0.078 <sup>b</sup><br><b>(69.81)</b> |
| IX                                                              | <b>BPA-HD + quercetin</b><br>(90 mg/kg body weight/day)  | 13.006 ±0.243 <sup>b</sup><br><b>(98.35)</b> | 5.414 ±0.137 <sup>b</sup><br><b>(80.70)</b>  | 1.198 ± 0.049 <sup>b</sup><br><b>(93.89)</b> | 0.651 ±<br>0.011 <sup>b</sup><br><b>(97.49)</b> | 0.501 ± 0.023 <sup>b</sup><br><b>(80.47)</b> | 2.664 ±<br>0.044 <sup>b</sup><br><b>(96.22)</b> |

Values are mean ± S.E.M., n=10

Values shown in parenthesis indicate:

Italics- Percent change in BPA-treated from untreated control

Bold- Organoprotective index from BPA-HD

Level of significance <sup>a</sup>p <0.05 as compared to vehicle control

<sup>b</sup>p <0.05 as compared to BPA-treated

No significant difference was noted between different control groups (Groups 1-3).

Units: <sup>1</sup>mg/100 mg tissue weight; <sup>2</sup>nmoles of androstenedione formed/mg protein/min.; <sup>3</sup>ng/dl.
